# Supplementary material
Source: MDPI journal article supplement (https://www.mdpi.com/2673-1924/2/4/38)
Supplement: s1 [file s1]

**Table S1.** Summary of the mean and the standard error (S.E.) of the larvae (standard length in mm) of both shoals and batches used in the study.

| Shoal     | Batch | Mean $\pm$ S.E.    |
|-----------|-------|--------------------|
| Natal     | 1     | 11.055 $\pm$ 0.232 |
| Non-natal | 1     | 11.599 $\pm$ 0.233 |
| Natal     | 2     | 11.918 $\pm$ 0.218 |
| Non-natal | 2     | 14.763 $\pm$ 0.396 |

**Table S2.** Summary of the mean and standard error (S.E.) of the preference of the focal larva (% time and % visits) for each stimulus shoal (natal and non-natal), sensory cues (visual, chemical, chemical and visual in simultaneous), and batch of experiments (1 and 2).

|                                                 | Shoal     | Batch | Mean   | S.E.   |
|-------------------------------------------------|-----------|-------|--------|--------|
| <i>Chemical cues</i>                            |           |       |        |        |
| % time                                          | Natal     | 1     | 5.670  | 4.570  |
|                                                 | Natal     | 2     | 3.110  | 2.452  |
|                                                 | Non-natal | 1     | 4.222  | 2.320  |
|                                                 | Non-natal | 2     | 12.220 | 7.342  |
| % visits                                        | Natal     | 1     | 14.790 | 6.218  |
|                                                 | Natal     | 2     | 11.333 | 5.742  |
|                                                 | Non-natal | 1     | 19.111 | 6.194  |
|                                                 | Non-natal | 2     | 23.444 | 6.466  |
| <i>Visual cues</i>                              |           |       |        |        |
| % time                                          | Natal     | 1     | 32.333 | 12.186 |
|                                                 | Natal     | 2     | 36.220 | 13.491 |
|                                                 | Non-natal | 1     | 11.333 | 4.604  |
|                                                 | Non-natal | 2     | 17.890 | 7.549  |
| % visits                                        | Natal     | 1     | 25.670 | 5.876  |
|                                                 | Natal     | 2     | 28.111 | 6.609  |
|                                                 | Non-natal | 1     | 19.444 | 6.377  |
|                                                 | Non-natal | 2     | 21.000 | 6.351  |
| <i>Chemical and visual cues in simultaneous</i> |           |       |        |        |
| % time                                          | Natal     | 1     | 28.875 | 12.163 |
|                                                 | Natal     | 2     | 27.440 | 10.472 |
|                                                 | Non-natal | 1     | 13.125 | 6.093  |
|                                                 | Non-natal | 2     | 16.890 | 10.302 |
| % visits                                        | Natal     | 1     | 26.875 | 7.756  |
|                                                 | Natal     | 2     | 30.222 | 5.254  |
|                                                 | Non-natal | 1     | 15.625 | 6.785  |
|                                                 | Non-natal | 2     | 13.110 | 6.217  |

**Table S3.** Summary statistics for differences in percentage of time and visits to each stimulus shoal, according to the sensory cues under test (visual, chemical, chemical and visual in simultaneous) and between batches (1 and 2), using Mann-Whitney U test; test value (U), Z-score, sample size (n in each batch), and the p-value (p).

| Differences between batches (1 and 2)           | Test value | Z      | N  | p     |
|-------------------------------------------------|------------|--------|----|-------|
| <i>Chemical cues</i>                            |            |        |    |       |
| % time near the natal shoal                     | 33.500     | 0.684  | 18 | 0.494 |
| % visits to the natal shoal                     | 35.500     | 0.452  | 18 | 0.651 |
| % time near the non-natal shoal                 | 37.500     | -0.231 | 18 | 0.817 |
| % visits to the non- natal shoal                | 36.500     | -0.317 | 18 | 0.751 |
| <i>Visual cues</i>                              |            |        |    |       |
| % time near the natal shoal                     | 37.500     | -0.221 | 18 | 0.825 |
| % visits to the natal shoal                     | 40.000     | 0.000  | 18 | 1.000 |
| % time near the non- natal shoal                | 35.000     | -0.455 | 18 | 0.649 |
| % visits to the non- natal shoal                | 36.5000    | -0.318 | 18 | 0.750 |
| <i>Chemical and visual cues in simultaneous</i> |            |        |    |       |
| % time near the natal shoal                     | 35.000     | -0.048 | 17 | 0.962 |
| % visits to the natal shoal                     | 35.500     | 0.000  | 17 | 0.962 |
| % time near the non- natal shoal                | 33.000     | 0.249  | 17 | 0.815 |
| % visits to the non- natal shoal                | 32.500     | 0.299  | 17 | 0.743 |
